# Supplementary material for: Novel human microbe-disease associations inference based on network consistency projection
Source: PubMed Central journal article supplement (PMC5966389; doi:10.1038/s41598-018-26448-8), 2018-05-23
Supplement: 41598_2018_26448_MOESM1_ESM.pdf [file 41598_2018_26448_MOESM1_ESM.pdf]

# **Novel human microbe-disease associations inference based on network consistency projection**

**Shuai Zou<sup>1</sup>, Jingpu Zhang<sup>1</sup> & Zuping Zhang<sup>1,\*</sup>**

<sup>1</sup>School of Information Science and Engineering, Central South University, Changsha, 410083, China

\* corresponding author's email: [zpzhang@csu.edu.cn](mailto:zpzhang@csu.edu.cn)

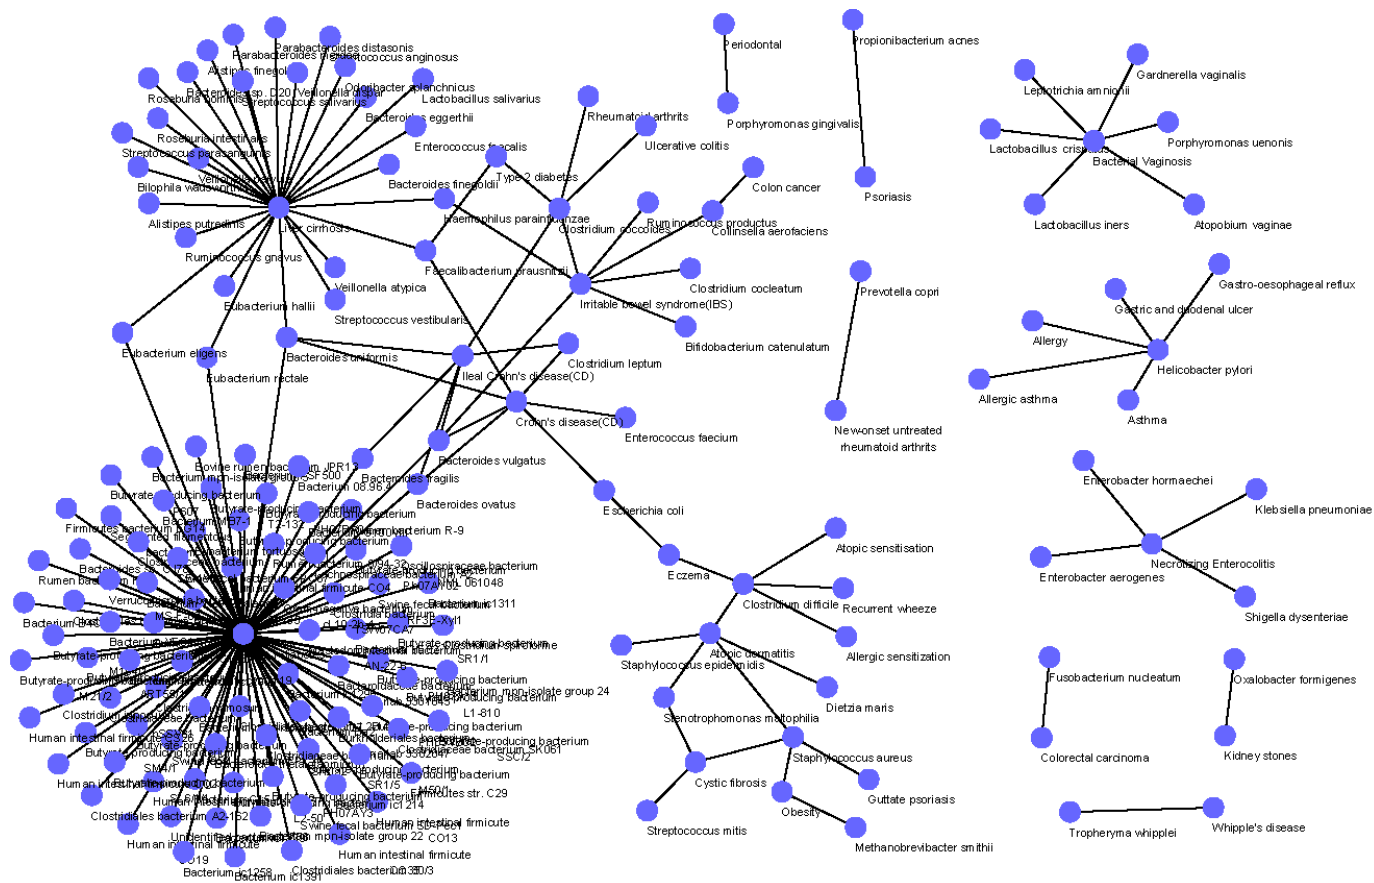

**S1. The microbe-disease association network of species level.**

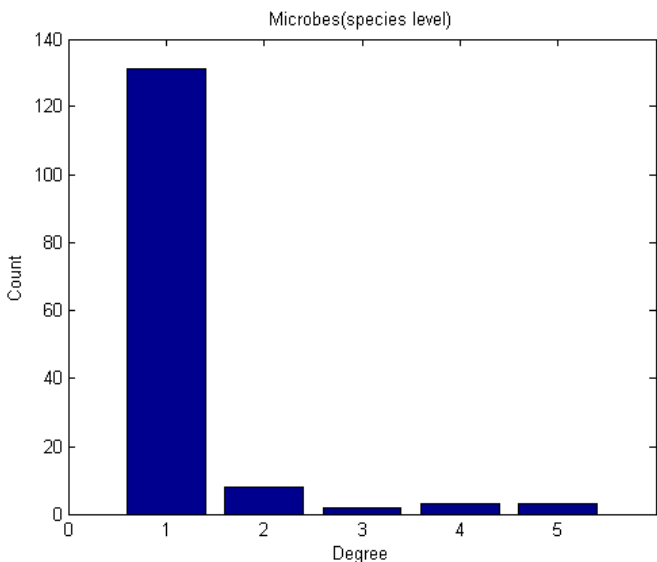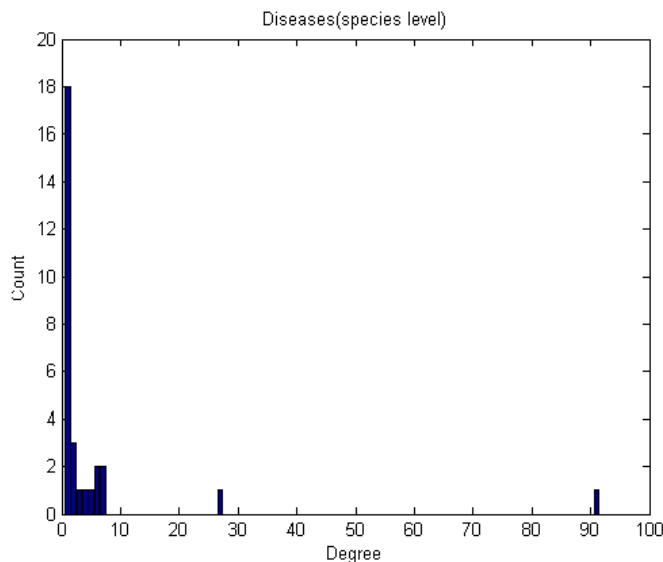

**S2. Degree distribution for microbes and diseases in the microbe-disease association network of species level. (a) Degree distribution of microbes. (b) Degree distribution of diseases.**

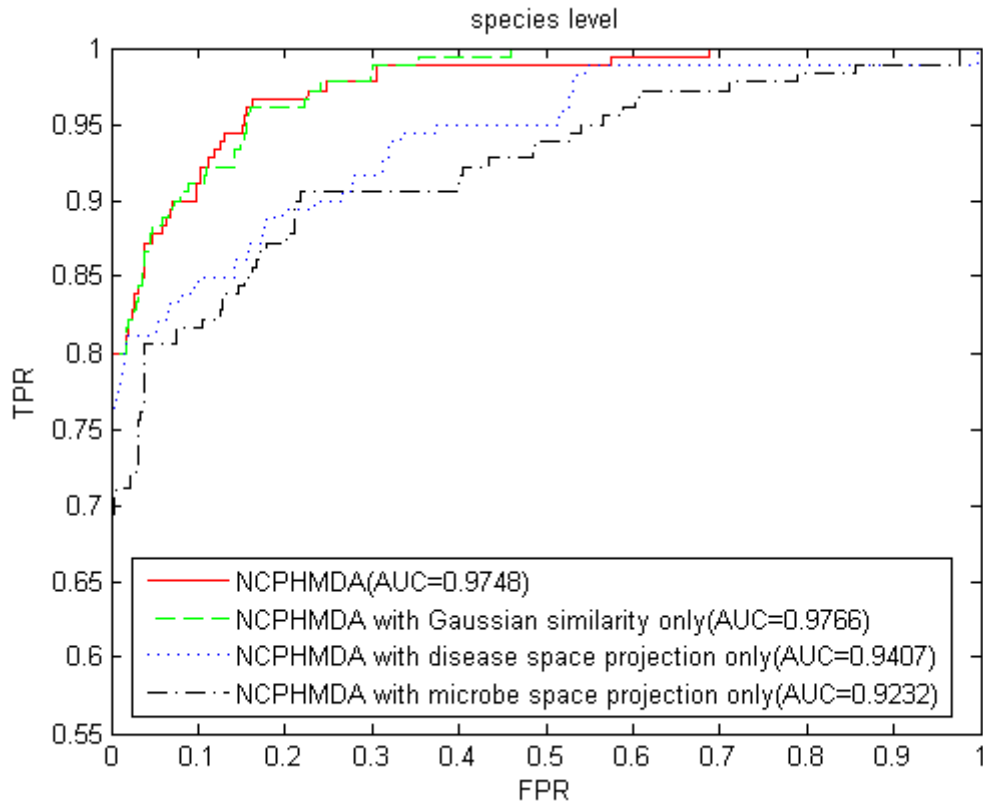

**S3. The ROC curves and AUC values of NCPHMDA based on LOOCV in different situations (species level).**

- (a) NCPHMDA with all information, (b) NCPHMDA with Gaussian interaction profile kernel similarity only, (c) NCPHMDA with disease space projection only, (d) NCPHMDA with microbe space projection only.

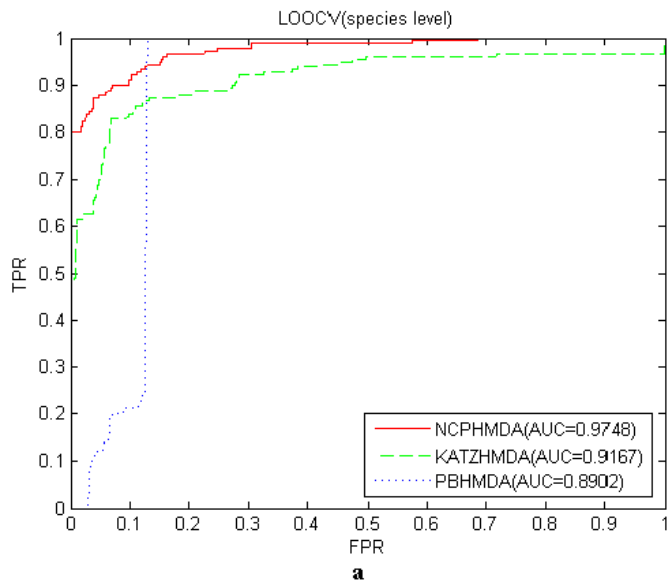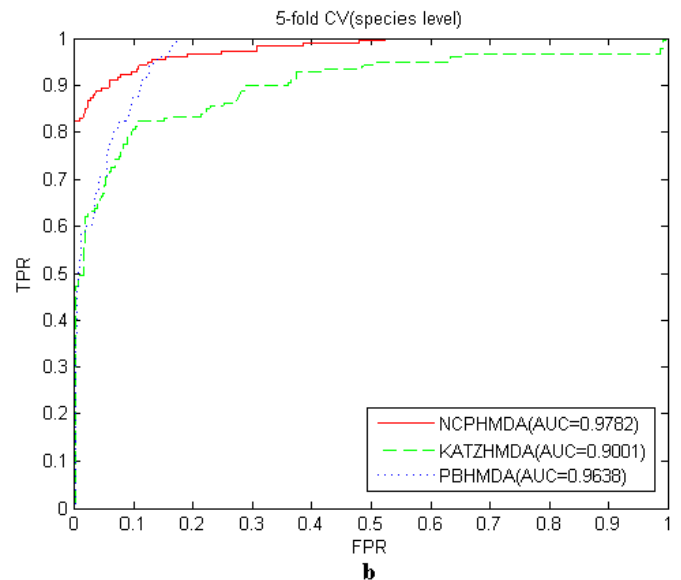

**S4. The ROC curves and AUC values of NCPHMDA, KATZHMDA and PBHMDA based on LOOCV and 5-fold CV (species level).**

- (a) The ROC curves and AUC values of NCPHMDA, KATZHMDA and PBHMDA based on LOOCV, (b) The ROC curves and AUC values of NCPHMDA, KATZHMDA and PBHMDA based on 5-fold CV.

## S5. The code for NCPHMDA.

```
load microbesimilarity.mat
load diseasesimilarity.mat
load diseasesymptomsimilarity.mat
load diseasemicrobeinteraction.mat
```

```
[nd,nm]=size(diseasemicrobeinteraction);
```

```
for i=1:nd
    for j=1:nd
        if(diseasesymptomsimilarity(i,j))
            kd(i,j) = diseasesymptomsimilarity(i,j);
        else
            kd(i,j) = diseasesimilarity(i,j);
        end
    end
end
```

```
km=microbesimilarity;
```

```
nep_d = zeros(nd,nm)+10^-30;
nep_m = zeros(nd,nm)+10^-30;
nep =zeros(nd,nm);
```

```
for i=1:nd
    nep_m(i,:) = (diseasemicrobeinteraction(i,:)*km)/norm(diseasemicrobeinteraction(i,:));
end
```

```
for j=1:nm
    nep_d(:,j) = (kd*diseasemicrobeinteraction(:,j))/norm(diseasemicrobeinteraction(:,j));
end
```

```
for i=1:nd
    for j=1:nm
        nep(i,j) = (nep_d(i,j) + nep_m(i,j))/(norm(kd(i,:))+norm(km(:,j)));
    end
end
```

```
result=nep';
```
